# Supplementary material for: A probe-based qRT-PCR method to profile immunological gene expression in blood of captive beluga whales (Delphinapterus leucas)
Source: PeerJ. 2017 Sep 27;5:e3840. doi: 10.7717/peerj.3840 (PMC5622604; doi:10.7717/peerj.3840)
Supplement: Supplemental Information 1 — Cq values of 6 target genes and 2 reference genes of the 12 healthy samples and 4 non-healthy samples. [file peerj-05-3840-s001.xlsx]

## Sheet: Sheet1
	IFN-r	IL-10	IL-12	IL-2Ra	IL-4	TNF-a	PGK1	RPL4
D 120911	40.4887	32.0573	34.4507	29.3918	36.5745	32.3009	25.9407	24.3435
D 120515	39.9551	32.2729	35.3987	29.6188	36.1261	32.2867	26.3407	24.7668
D 120110	40.0011	32.2564	34.9725	29.8307	36.1858	33.1757	26.5021	24.9518
D 111207	39.9496	32.5738	35.7904	30.5852	37.2537	32.7329	27.2179	25.6857
B 120110	39.5005	31.5	34.9441	29.3698	36.25	32.1388	26.1699	24.3215
B 120214	41.7464	33.4076	36.0063	31.4028	37.7609	33.6243	27.9088	26.2197
B 120807	41.6918	32.9927	37.824	30.8513	37.3161	33.0616	27.4479	25.8072
B 120911	39.9972	33.5716	37.5741	31.2979	37.5539	33.9151	28.1978	26.5111
C 120410	39.9012	33.8854	35.1178	30.9031	37.9887	34.1018	27.5352	25.5872
C 121212	40.1111	33.3265	37.226	31.0003	38.2857	34.7395	27.4586	26.0825
A 111207	40.5441	33.4459	35.1093	30.3566	36.9382	32.6217	27.1478	25.6436
A 130109	39.9373	33.0337	36.9458	29.5001	37.435	33.348	26.8576	25.1942
C 120313	39.6925	33.2324	37.454	31.4928	40.8326	34.9472	27.8396	25.8691
C 130515	34.0954	32.8826	36.6143	31.1464	38.286	42.3605	27.094	24.6235
A 120911	40.5565	34.732	36.175	30.2144	38.1988	34.0839	28.1089	26.5048
A 120110	40.0497	33.4711	30.0906	30.2235	37.0863	34.0026	27.2647	25.66
